# Supplementary material for: Using feeding regime as a microbial selective pressure to optimise biogas production and digestate sanitisation from slurry-based anaerobic digestion
Source: Environ Microbiome. 2026 May 22;21:92. doi: 10.1186/s40793-026-00902-x (PMC13404572; doi:10.1186/s40793-026-00902-x)
Supplement: Supplementary file 3 — Additional file 3: Metagenomics samples information. [file 40793_2026_902_MOESM3_ESM.xlsx]

## Sheet: metadata_final2
sample_number	name	day	reactor	sample_date	library_construction_type	sequencing_method_used	operational_temperature	feeding_regime	olr	phase	stability	country	slurry_source_animal	slurry_source_location	fog_source	slurry_fog_ratio	feedstock_coliforms_cfu_g	feedstock_ecoli_cfu_g	feedstock_enterococci_cfu_g	coliforms_cfu_g	e_coli_cfu_g	enterococci_log10_cfu_g	ph	ts_percentage	vs_percentage	scod_g_l	tcod_g_l	ammonia_mg_l	biogas_volume_ml	ch4_percentage	ch4_g_vs_fed
WSG1	Reactor_1_Day_78	78	R1	22/06/2017	Metagenome	Illumina	37	FR1	2	Phase1	Pre_weekend	Ireland	Dairy cow	Oranmore	Bacon pre-cook	02:01:00	68700000	46100000	142000	602000	520000	98500	7.8	5.52	3.95	7.84	66.37	1625	11000	51.31	300.4
WGS2	Reactor_2_Day_82	82	R2	26/06/2017	Metagenome	Illumina	37	FR1	2	Phase1	Post-weekend	Ireland	Dairy cow	Oranmore	Bacon pre-cook	02:01:00	64900000	43500000	96000	4100	4100	21100	7.93	5.5062	3.85	8.47	62.01	1900	23250	61.21	252.5
WGS3	Reactor_3_Day_92	92	R3	2017-06-07	Metagenome	Illumina	37	FR1	2	Phase1	Pre_weekend	Ireland	Dairy cow	Oranmore	Bacon pre-cook	02:01:00	48800000	30800000	160000	613000	305000	9600	7.9	5.66	4.08	9.37	57.89	1805	10050	54.64	292.3
WGS4	Reactor_3_Day_96	96	R3	2017-10-07	Metagenome	Illumina	37	FR1	2	Phase1	Post_weekend	Ireland	Dairy cow	Oranmore	Bacon pre-cook	02:01:00	43500000	48800000	85000	13200	3100	13200	7.89	5.77	4.11	9.15	52.29	1860	23000	58.65	239.3
WGS5	Reactor_2_Day_102	102	R2	16/07/2017	Metagenome	Illumina	37	FR2	2	Phase2	Acclimatisation	Ireland	Dairy cow	Oranmore	Bacon pre-cook	02:01:00	21000000	14700000	740000	921000	435000	22800	7.76	5.66	4.04	9.69	66.54	1975	23600	56.7	237.4
WGS6	Reactor_1_Day_123	123	R1	2017-06-08	Metagenome	Illumina	37	FR2	2	Phase2	Acclimatisation	Ireland	Dairy cow	Oranmore	Bacon pre-cook	02:01:00	16000000	13500000	8400	3370	2980	21400	7.88	5.86	4.13	10.86	57.83	2005	33050	60.23	353.2
WGS7	Reactor_2_Day_153	153	R2	2017-05-09	Metagenome	Illumina	37	FR2	2	Phase3	Stable_operation	Ireland	Dairy cow	Oranmore	Bacon pre-cook	02:01:00	77000000	23800000	18500	50	0	1260	7.95	6.92	4.84	12.69	99.01	2315	17900	55.86	177.4
WGS8	Reactor_3_Day_213	213	R3	2017-04-11	Metagenome	Illumina	37	FR2	2	Phase3	Stable_operation	Ireland	Dairy cow	Oranmore	Bacon pre-cook	02:01:00	9590000	6890000	40200	410	200	12400	7.77	5.54	3.77	9.93	60.31	1805	30200	60.24	322.8
WGS9	Reactor_2_Day_78	78	R2	22/06/2017	Metagenome	Illumina	37	FR1	2	Phase1	Pre_weekend	Ireland	Dairy cow	Oranmore	Bacon pre-cook	02:01:00	68700000	46100000	142000	455000	432000	86000	7.79	5.65	4.05	9.21	52.74	1600	10250	53.09	289.6
WGS10	Reactor_3_Day_82	82	R3	26/06/2017	Metagenome	Illumina	37	FR1	2	Phase1	Post_weekend	Ireland	Dairy cow	Oranmore	Bacon pre-cook	02:01:00	64900000	43500000	96000	4100	1000	17100	7.86	5.64	3.97	7.88	56.59	1845	20000	60.8	215.7
WGS11	Reactor_1_Day_92	92	R1	2017-06-07	Metagenome	Illumina	37	FR1	2	Phase1	Pre_weekend	Ireland	Dairy cow	Oranmore	Bacon pre-cook	02:01:00	48800000	30800000	160000	504000	345000	22800	7.88	5.66	4.06	9.43	59.11	1770	10400	56.26	311.4
WGS12	Reactor_1_Day_96	96	R1	2017-10-07	Metagenome	Illumina	37	FR1	2	Phase1	Post-weekend	Ireland	Dairy cow	Oranmore	Bacon pre-cook	02:01:00	43500000	48800000	85000	21300	5200	58800	7.88	5.79	4.11	8.21	61.52	1825	26000	58.42	269.5
WGS13	Reactor_3_Day_102	102	R3	16/07/2017	Metagenome	Illumina	37	FR2	2	Phase2	Acclimatisation	Ireland	Dairy cow	Oranmore	Bacon pre-cook	02:01:00	21000000	14700000	740000	39300	25600	19700	7.76	5.51	3.96	8.21	63	1935	23500	55.51	231.4
WGS14	Reactor_2_Day_123	123	R2	2017-06-08	Metagenome	Illumina	37	FR2	2	Phase2	Acclimatisation	Ireland	Dairy cow	Oranmore	Bacon pre-cook	02:01:00	16000000	13500000	8400	4430	4430	15100	7.84	6.02	4.24	11.52	68.75	1950	32050	60.17	342.1
WGS15	Reactor_3_Day_153	153	R3	2017-05-09	Metagenome	Illumina	37	FR2	2	Phase3	Stable_operation	Ireland	Dairy cow	Oranmore	Bacon pre-cook	02:01:00	77000000	23800000	18500	100	0	4670	7.92	6.36	4.32	11.49	65.37	1910	29400	63.5	331.2
WGS16	Reactor_1_Day_213	213	R1	2017-04-11	Metagenome	Illumina	37	FR2	2	Phase3	Stable_operation	Ireland	Dairy cow	Oranmore	Bacon pre-cook	02:01:00	9590000	6890000	40200	300	100	10300	7.79	5.4	3.71	9.91	64.74	2085	29700	61	321.4
WGS17	Reactor_3_Day_78	78	R3	22/06/2017	Metagenome	Illumina	37	FR1	2	Phase1	Pre_weekend	Ireland	Dairy cow	Oranmore	Bacon pre-cook	02:01:00	68700000	46100000	142000	520000	473000	50400	7.81	5.8	4.07	9.5	64.97	1740	10300	54.25	297.4
WGS18	Reactor_1_Day_82	82	R1	26/06/2017	Metagenome	Illumina	37	FR1	2	Phase1	Post_weekend	Ireland	Dairy cow	Oranmore	Bacon pre-cook	02:01:00	64900000	43500000	96000	3100	1000	19700	7.89	5.38	3.78	8.01	50.87	1510	23250	61.21	252.5
WGS19	Reactor_2_Day_92	92	R2	2017-06-07	Metagenome	Illumina	37	FR1	2	Phase1	Pre_weekend	Ireland	Dairy cow	Oranmore	Bacon pre-cook	02:01:00	48800000	30800000	160000	644000	441000	11000	7.86	5.7	4.12	9.66	60.57	1695	10500	56.79	317.4
WGS20	Reactor_2_Day_96	96	R2	2017-10-07	Metagenome	Illumina	37	FR1	2	Phase1	Post_weekend	Ireland	Dairy cow	Oranmore	Bacon pre-cook	02:01:00	43500000	48800000	85000	14800	5200	34500	7.88	5.67	4	9.1	57.15	1940	23000	60.45	246.7
WGS21	Reactor_1_Day_102	102	R1	16/07/2017	Metagenome	Illumina	37	FR2	2	Phase2	Acclimatisation	Ireland	Dairy cow	Oranmore	Bacon pre-cook	02:01:00	21000000	14700000	740000	1300000	866000	29900	7.74	5.61	3.96	9.97	72.42	1830	24100	55.31	236.5
WGS22	Reactor_3_Day_123	123	R3	2017-06-08	Metagenome	Illumina	37	FR2	2	Phase2	Acclimatisation	Ireland	Dairy cow	Oranmore	Bacon pre-cook	02:01:00	16000000	13500000	8400	1990	1730	5510	7.88	5.96	4.14	11	64.58	2065	33050	60.23	353.2
WGS23	Reactor_1_Day_153	153	R1	2017-05-09	Metagenome	Illumina	37	FR2	2	Phase3	Stable_operation	Ireland	Dairy cow	Oranmore	Bacon pre-cook	02:01:00	77000000	23800000	18500	100	50	1050	7.91	6.04	4.17	9.71	66.69	2095	32800	60.95	354.7
WGS24	Reactor_2_Day_213	213	R2	2017-04-11	Metagenome	Illumina	37	FR2	2	Phase3	Stable_operation	Ireland	Dairy cow	Oranmore	Bacon pre-cook	02:01:00	9590000	6890000	40200	200	0	8670	7.77	5.67	3.84	10.05	58.46	1715	29100	62.59	323.1
